# Supplementary material
Source: PubMed Central journal article supplement (PMC2805491)

Supplementary Figure 1A.

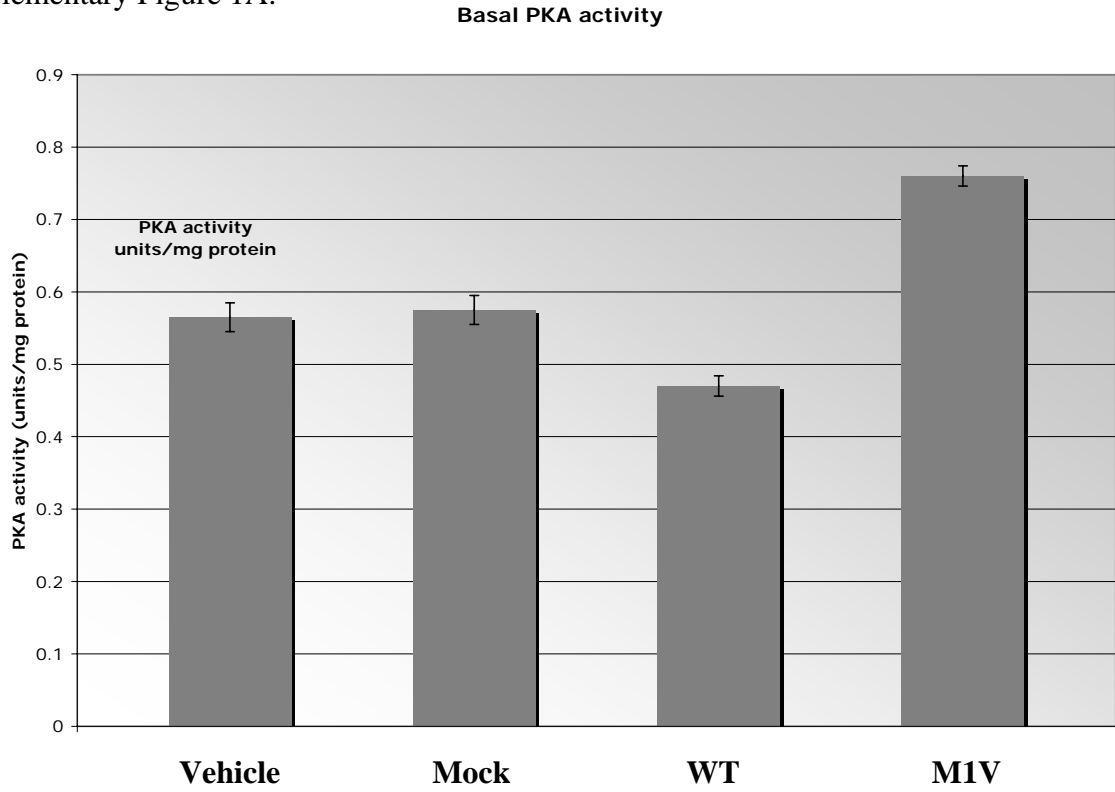

Supplementary Figure 1B.

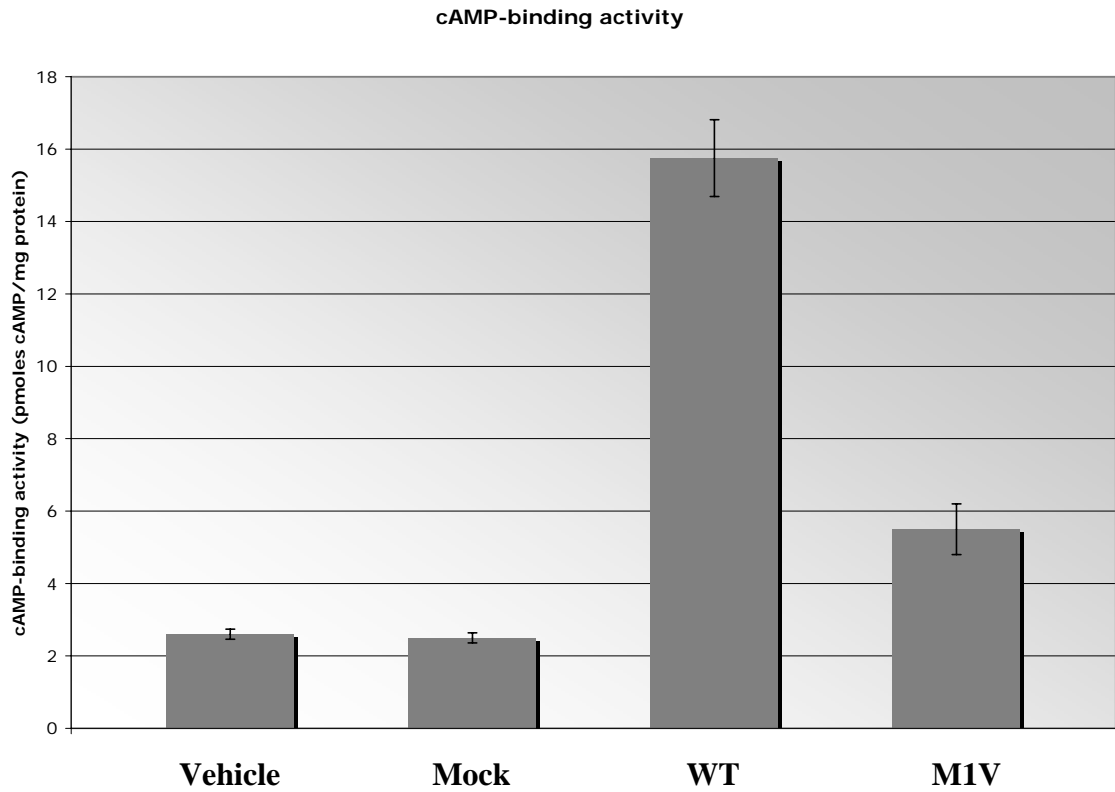

Supplement: jc.2009-0993_2.pdf [file jc.2009-0993_2.pdf]
